# Supplementary material for: MicroRNA profiles in hippocampal granule cells and plasma of rats with pilocarpine-induced epilepsy – comparison with human epileptic samples
Source: PubMed Central journal article supplement (PMC4585664; doi:10.1038/srep14143), 2015-09-18
Supplement: srep14143-s1.pdf [file srep14143-s1.pdf]

# Supplementary information

## **MicroRNA profiles in hippocampal granule cells and plasma of rats with pilocarpine-induced epilepsy – comparison with human epileptic samples.**

Paolo Roncon, Marie Soukupová, Anna Binaschi, Chiara Falcicchia, Silvia Zucchini, Manuela Ferracin, Sarah R Langley, Enrico Petretto, Michael R Johnson, Gianluca Marucci, Roberto Michelucci, Guido Rubboli, Michele Simonato

### Contents

- Supplementary Tables S1-S5
- Supplementary Figures S1-S7

**Supplementary Table S1. Significantly dys-regulated miRNAs in the GCL of epileptic compared with control animals.**

| <b>miRNA</b>  | <b>P</b>            | <b>P adjusted</b>   |
|---------------|---------------------|---------------------|
| miR-21-5p     | 6,57 <sup>-09</sup> | 1,73 <sup>-06</sup> |
| miR-132-3p    | 1,36 <sup>-07</sup> | 1,19 <sup>-05</sup> |
| miR-20a-5p    | 1,35 <sup>-07</sup> | 1,19 <sup>-05</sup> |
| miR-212-3p    | 5,71 <sup>-07</sup> | 3,75 <sup>-05</sup> |
| miR-29c-5p    | 8,57 <sup>-07</sup> | 4,5 <sup>-05</sup>  |
| miR-652-3p    | 4,55 <sup>-06</sup> | 1,99 <sup>-04</sup> |
| miR-551b-3p   | 1,31 <sup>-05</sup> | 4,91 <sup>-04</sup> |
| miR-92a-3p    | 1,64 <sup>-05</sup> | 5,38 <sup>-04</sup> |
| miR-344b-2-3p | 2,16 <sup>-05</sup> | 6,32 <sup>-04</sup> |
| miR-15b-5p    | 5,61 <sup>-05</sup> | 1,46 <sup>-03</sup> |
| miR-24-3p     | 6,12 <sup>-05</sup> | 1,46 <sup>-03</sup> |
| miR-23a-3p    | 0,0001              | 2,44 <sup>-03</sup> |
| miR-222-3p    | 0,0002              | 3,23 <sup>-03</sup> |
| miR-181d-5p   | 0,0002              | 3,97 <sup>-03</sup> |
| miR-674-3p    | 0,0002              | 4,28 <sup>-03</sup> |
| miR-142-3p    | 0,0003              | 4,96 <sup>-03</sup> |
| miR-17-5p     | 0,0003              | 4,96 <sup>-03</sup> |
| miR-874-3p    | 0,0004              | 6,00 <sup>-03</sup> |
| miR-27a-3p    | 0,0004              | 6,00 <sup>-03</sup> |
| miR-19b-3p    | 0,001               | 1,37 <sup>-02</sup> |
| miR-93-5p     | 0,0011              | 1,39 <sup>-02</sup> |
| miR-433-3p    | 0,0012              | 1,45 <sup>-02</sup> |
| miR-30a-5p    | 0,0013              | 1,47 <sup>-02</sup> |
| miR-18a-5p    | 0,0016              | 1,53 <sup>-02</sup> |
| miR-146a-5p   | 0,0015              | 1,53 <sup>-02</sup> |
| miR-20b-5p    | 0,0014              | 1,53 <sup>-02</sup> |
| miR-138-5p    | 0,0015              | 1,53 <sup>-02</sup> |
| miR-431       | 0,0024              | 2,21 <sup>-02</sup> |
| miR-130a-3p   | 0,0024              | 2,21 <sup>-02</sup> |
| miR-7a-5p     | 0,0025              | 2,22 <sup>-02</sup> |
| miR-3584-5p   | 0,0028              | 2,41 <sup>-02</sup> |
| miR-23b-3p    | 0,0035              | 2,87 <sup>-02</sup> |
| miR-181c-5p   | 0,0051              | 4,14 <sup>-02</sup> |
| miR-30e-3p    | 0,0056              | 4,34 <sup>-02</sup> |
| miR-129-5p    | 0,0062              | 4,67 <sup>-02</sup> |
| miR-296-5p    | 0,0065              | 4,72 <sup>-02</sup> |
| miR-505-3p    | 0,0073              | 5,05 <sup>-02</sup> |
| miR-19a-3p    | 0,0073              | 5,05 <sup>-02</sup> |

|                     |        |                     |
|---------------------|--------|---------------------|
| <b>miR-154-3p</b>   | 0,0077 | 5,19 <sup>-02</sup> |
| <b>miR-139-5p</b>   | 0,0084 | 5,51 <sup>-02</sup> |
| <b>miR-204-5p</b>   | 0,009  | 5,81 <sup>-02</sup> |
| <b>miR-410-3p</b>   | 0,0096 | 6,04 <sup>-02</sup> |
| <b>miR-129-1-3p</b> | 0,0100 | 6,13 <sup>-02</sup> |
| <b>miR-186-5p</b>   | 0,0107 | 6,40 <sup>-02</sup> |
| <b>miR-337-5p</b>   | 0,0114 | 6,48 <sup>-02</sup> |
| <b>miR-324-3p</b>   | 0,0111 | 6,48 <sup>-02</sup> |
| <b>miR-485-5p</b>   | 0,0115 | 6,48 <sup>-02</sup> |
| <b>miR-466b-5p</b>  | 0,0124 | 6,81 <sup>-02</sup> |
| <b>let-7c-5p</b>    | 0,0127 | 6,85 <sup>-02</sup> |
| <b>miR-873-5p</b>   | 0,0142 | 7,50 <sup>-02</sup> |
| <b>miR-344b-5p</b>  | 0,0154 | 7,89 <sup>-02</sup> |
| <b>miR-380-3p</b>   | 0,0157 | 7,89 <sup>-02</sup> |
| <b>let-7b-5p</b>    | 0,0162 | 7,89 <sup>-02</sup> |
| <b>miR-107-3p</b>   | 0,0162 | 7,89 <sup>-02</sup> |
| <b>miR-140-3p</b>   | 0,0174 | 8,33 <sup>-02</sup> |
| <b>miR-409a-5p</b>  | 0,0182 | 8,56 <sup>-02</sup> |
| <b>miR-7a-1-3p</b>  | 0,0186 | 8,60 <sup>-02</sup> |
| <b>miR-30c-2-3p</b> | 0,0195 | 8,70 <sup>-02</sup> |
| <b>miR-129-2-3p</b> | 0,0192 | 8,70 <sup>-02</sup> |
| <b>miR-500-3p</b>   | 0,0202 | 8,87 <sup>-02</sup> |
| <b>miR-212-5p</b>   | 0,0217 | 9,37 <sup>-02</sup> |
| <b>miR-328a-3p</b>  | 0,0222 | 9,43 <sup>-02</sup> |
| <b>miR-665</b>      | 0,0231 | 9,64 <sup>-02</sup> |

**Supplementary Table S2. Significantly dys-regulated miRNAs in the GCL in latency (four and eight days after SE) compared with control animals.**

|               | <b>P</b> | <b>Fold change</b> | <b>Regulation</b> |
|---------------|----------|--------------------|-------------------|
| miR-142-3p    | 0,067    | 34,11              | up                |
| miR-344b-2-3p | 0,030    | 23,32              | up                |
| miR-3584-5p   | 0,089    | 18,28              | up                |
| miR-17-5p     | 0,047    | 18,16              | up                |
| miR-30c-2-3p  | 0,077    | 11,94              | down              |
| miR-181a-1-3p | 0,093    | 9,02               | down              |
| miR-132-3p    | 0,002    | 4,58               | up                |
| miR-21-5p     | 0,008    | 3,56               | up                |
| miR-212-3p    | 0,002    | 2,95               | up                |
| miR-181d-5p   | 0,022    | 2,57               | up                |
| miR-27a-3p    | 0,026    | 2,08               | up                |
| miR-30e-3p    | 0,030    | 2,06               | down              |
| miR-92a-3p    | 0,046    | 2,04               | up                |
| miR-20a-5p    | 0,030    | 2,00               | up                |
| miR-874-3p    | 0,093    | 2,00               | up                |
| miR-139-5p    | 0,094    | 1,97               | down              |
| miR-431       | 0,091    | 1,88               | up                |
| miR-30a-3p    | 0,094    | 1,82               | down              |
| miR-551b-3p   | 0,030    | 1,71               | down              |
| miR-23a-3p    | 0,070    | 1,65               | up                |
| miR-433-3p    | 0,033    | 1,59               | up                |
| miR-330-3p    | 0,091    | 1,58               | down              |
| miR-370-3p    | 0,071    | 1,53               | up                |
| miR-138-5p    | 0,022    | 1,50               | down              |
| miR-140-3p    | 0,030    | 1,48               | down              |
| miR-128-3p    | 0,053    | 1,43               | down              |
| miR-380-3p    | 0,041    | 1,43               | up                |
| miR-29c-5p    | 0,008    | 1,43               | down              |
| miR-30a-5p    | 0,030    | 1,39               | down              |
| miR-300-3p    | 0,077    | 1,30               | up                |
| miR-652-3p    | 0,070    | 1,29               | down              |
| miR-186-5p    | 0,100    | 1,24               | down              |
| miR-103-3p    | 0,070    | 1,11               | down              |

**Supplementary Table S3. Significantly dys-regulated miRNAs in the GCL of rats at the time of the first spontaneous seizure compared with controls.**

|               | <b>P</b> | <b>Fold change</b> | <b>Regulation</b> |
|---------------|----------|--------------------|-------------------|
| miR-142-3p    | 0,067    | 34,11              | up                |
| miR-344b-2-3p | 0,030    | 23,32              | up                |
| miR-3584-5p   | 0,089    | 18,28              | up                |
| miR-17-5p     | 0,047    | 18,16              | up                |
| miR-30c-2-3p  | 0,077    | 11,94              | down              |
| miR-181a-1-3p | 0,093    | 9,02               | down              |
| miR-132-3p    | 0,002    | 4,58               | up                |
| miR-21-5p     | 0,008    | 3,56               | up                |
| miR-212-3p    | 0,002    | 2,95               | up                |
| miR-181d-5p   | 0,022    | 2,57               | up                |
| miR-27a-3p    | 0,026    | 2,08               | up                |
| miR-30e-3p    | 0,030    | 2,06               | down              |
| miR-92a-3p    | 0,046    | 2,04               | up                |
| miR-20a-5p    | 0,030    | 2,00               | up                |
| miR-874-3p    | 0,093    | 2,00               | up                |
| miR-139-5p    | 0,094    | 1,97               | down              |
| miR-431       | 0,091    | 1,88               | up                |
| miR-30a-3p    | 0,094    | 1,82               | down              |
| miR-551b-3p   | 0,030    | 1,71               | down              |
| miR-23a-3p    | 0,070    | 1,65               | up                |
| miR-433-3p    | 0,033    | 1,59               | up                |
| miR-330-3p    | 0,091    | 1,58               | down              |
| miR-370-3p    | 0,071    | 1,53               | up                |
| miR-138-5p    | 0,022    | 1,50               | down              |
| miR-140-3p    | 0,030    | 1,48               | down              |
| miR-128-3p    | 0,053    | 1,43               | down              |
| miR-380-3p    | 0,041    | 1,43               | up                |
| miR-29c-5p    | 0,008    | 1,43               | down              |
| miR-30a-5p    | 0,030    | 1,39               | down              |
| miR-300-3p    | 0,077    | 1,30               | up                |
| miR-652-3p    | 0,070    | 1,29               | down              |
| miR-186-5p    | 0,100    | 1,24               | down              |
| miR-103-3p    | 0,070    | 1,11               | down              |

**Supplementary Table S4. Significantly dys-regulated miRNAs in the GCL of chronically epileptic compared with control animals.**

|                      | <b>P</b>             | <b>Fold change</b> | <b>Regulation</b> |
|----------------------|----------------------|--------------------|-------------------|
| <b>miR-154-3p</b>    | 8,608 <sup>-04</sup> | 36,68              | up                |
| <b>miR-146a-5p</b>   | 4,274 <sup>-02</sup> | 21,24              | up                |
| <b>miR-344b-2-3p</b> | 8,079 <sup>-02</sup> | 18,01              | up                |
| <b>miR-31a-5p</b>    | 4,962 <sup>-02</sup> | 4,53               | down              |
| <b>miR-181d-5p</b>   | 2,018 <sup>-02</sup> | 3,62               | up                |
| <b>miR-132-3p</b>    | 2,018 <sup>-02</sup> | 3,51               | up                |
| <b>miR-551b-3p</b>   | 2,357 <sup>-02</sup> | 2,75               | down              |
| <b>miR-212-3p</b>    | 2,018 <sup>-02</sup> | 2,39               | up                |
| <b>miR-873-5p</b>    | 2,768 <sup>-02</sup> | 2,28               | down              |
| <b>miR-652-3p</b>    | 2,018 <sup>-02</sup> | 1,93               | down              |
| <b>miR-181c-5p</b>   | 5,467 <sup>-02</sup> | 1,91               | up                |
| <b>miR-23a-3p</b>    | 2,018 <sup>-02</sup> | 1,84               | up                |
| <b>miR-433-5p</b>    | 2,357 <sup>-02</sup> | 1,71               | up                |
| <b>miR-433-3p</b>    | 5,082 <sup>-02</sup> | 1,70               | up                |
| <b>miR-409a-5p</b>   | 8,079 <sup>-02</sup> | 1,60               | up                |
| <b>miR-410-3p</b>    | 8,079 <sup>-02</sup> | 1,53               | up                |
| <b>miR-1949</b>      | 4,274 <sup>-02</sup> | 1,48               | down              |
| <b>miR-380-3p</b>    | 8,079 <sup>-02</sup> | 1,45               | up                |
| <b>miR-30a-5p</b>    | 2,392 <sup>-02</sup> | 1,45               | down              |
| <b>miR-411-3p</b>    | 8,079 <sup>-02</sup> | 1,40               | up                |
| <b>miR-140-3p</b>    | 8,079 <sup>-02</sup> | 1,32               | down              |
| <b>miR-664-3p</b>    | 8,079 <sup>-02</sup> | 1,31               | down              |
| <b>miR-29c-5p</b>    | 2,018 <sup>-02</sup> | 1,28               | down              |
| <b>miR-21-5p</b>     | 5,214 <sup>-02</sup> | 1,25               | up                |
| <b>miR-148b-3p</b>   | 8,079 <sup>-02</sup> | 1,23               | down              |

**Supplementary Table S5. Significantly dys-regulated miRNAs in the plasma of epileptic compared with control animals.**

| <b>miRNA</b>  | <b>P</b> | <b>P adjusted</b> |
|---------------|----------|-------------------|
| miR.598.5p    | 0,0002   | 0,0833            |
| miR.300.3p    | 0,0160   | 0,4286            |
| miR.381.3p    | 0,0069   | 0,4286            |
| miR.3582      | 0,0027   | 0,4286            |
| miR.199a.5p   | 0,0076   | 0,4286            |
| miR.181a.1.3p | 0,0131   | 0,4286            |
| miR.30c.2.3p  | 0,0103   | 0,4286            |
| miR.10b.5p    | 0,0164   | 0,4286            |
| miR.214.3p    | 0,0097   | 0,4286            |
| miR.466b.1.3p | 0,0099   | 0,4286            |
| miR.144.3p    | 0,0141   | 0,4286            |
| miR.142.3p    | 0,0154   | 0,4286            |
| miR.3065.3p   | 0,0074   | 0,4286            |
| miR.125b.2.3p | 0,0263   | 0,4853            |
| miR.466c.3p   | 0,0300   | 0,4853            |
| miR.429       | 0,0326   | 0,4853            |
| miR.32.3p     | 0,0329   | 0,4853            |
| miR.374.5p    | 0,0234   | 0,4853            |
| miR.208a.5p   | 0,0323   | 0,4853            |
| miR.328a.3p   | 0,0278   | 0,4853            |
| miR.210.3p    | 0,0328   | 0,4853            |
| miR.494.3p    | 0,0231   | 0,4853            |
| miR.465.5p    | 0,0324   | 0,4853            |
| miR.142.5p    | 0,0375   | 0,5293            |
| miR.1188.3p   | 0,0395   | 0,5353            |
| miR.770.3p    | 0,0467   | 0,5676            |
| miR.101b.3p   | 0,0486   | 0,5676            |
| miR.598.5p    | 0,0477   | 0,5676            |
| miR.300.3p    | 0,0160   | 0,4286            |

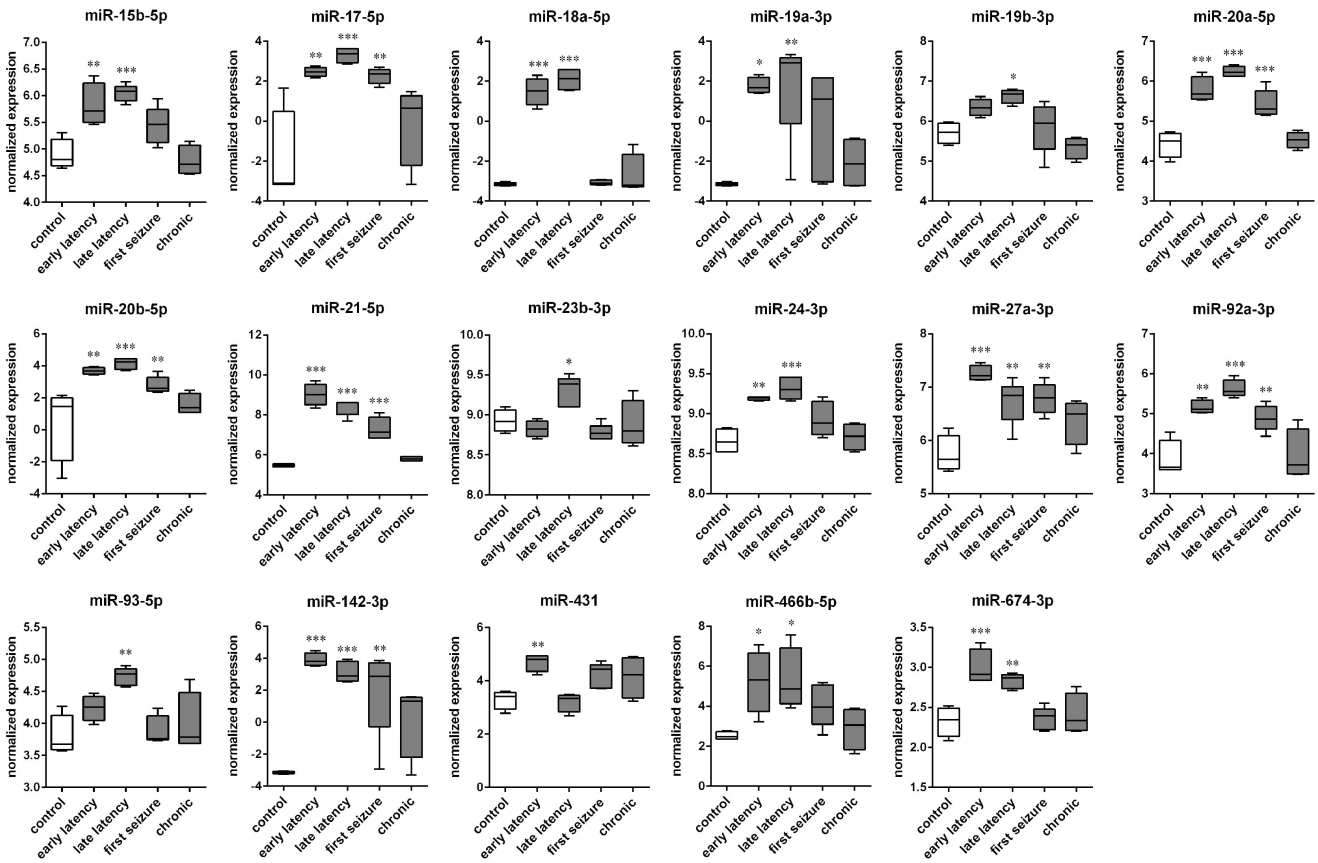

**Supplementary Fig. S1.** Up-regulated miRNAs in the rat granule cell layer (GCL) during latency. The boxplots depict the time course of expression for 17 of the miRNAs identified as significant with a false discovery rate (FDR)<10% in the GCL by using one-way ANOVA. Each boxplot represents 4 animals. \*  $p < 0.05$ ; \*\*  $p < 0.01$ ; \*\*\*  $p < 0.001$ ; Tukey's test.



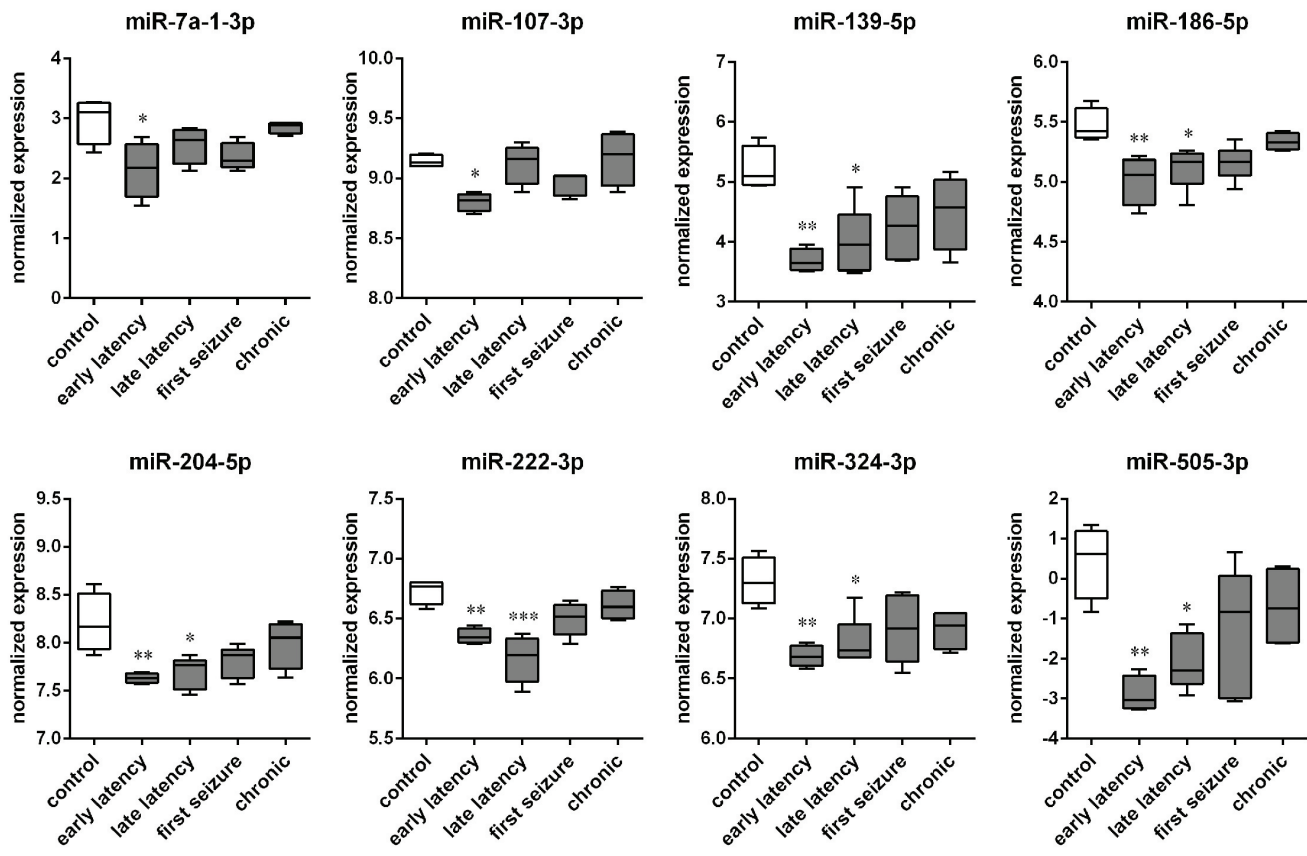

**Supplementary Fig. S2.** Down-regulated miRNAs in the rat granule cell layer (GCL) during latency. The boxplots depict the time course of expression for 8 of the miRNAs identified as significant with a false discovery rate (FDR)<10% in the GCL by using one-way ANOVA. Each boxplot represents 4 animals. \*  $p < 0.05$ ; \*\*  $p < 0.01$ ; \*\*\*  $p < 0.001$ ; Tukey's test.

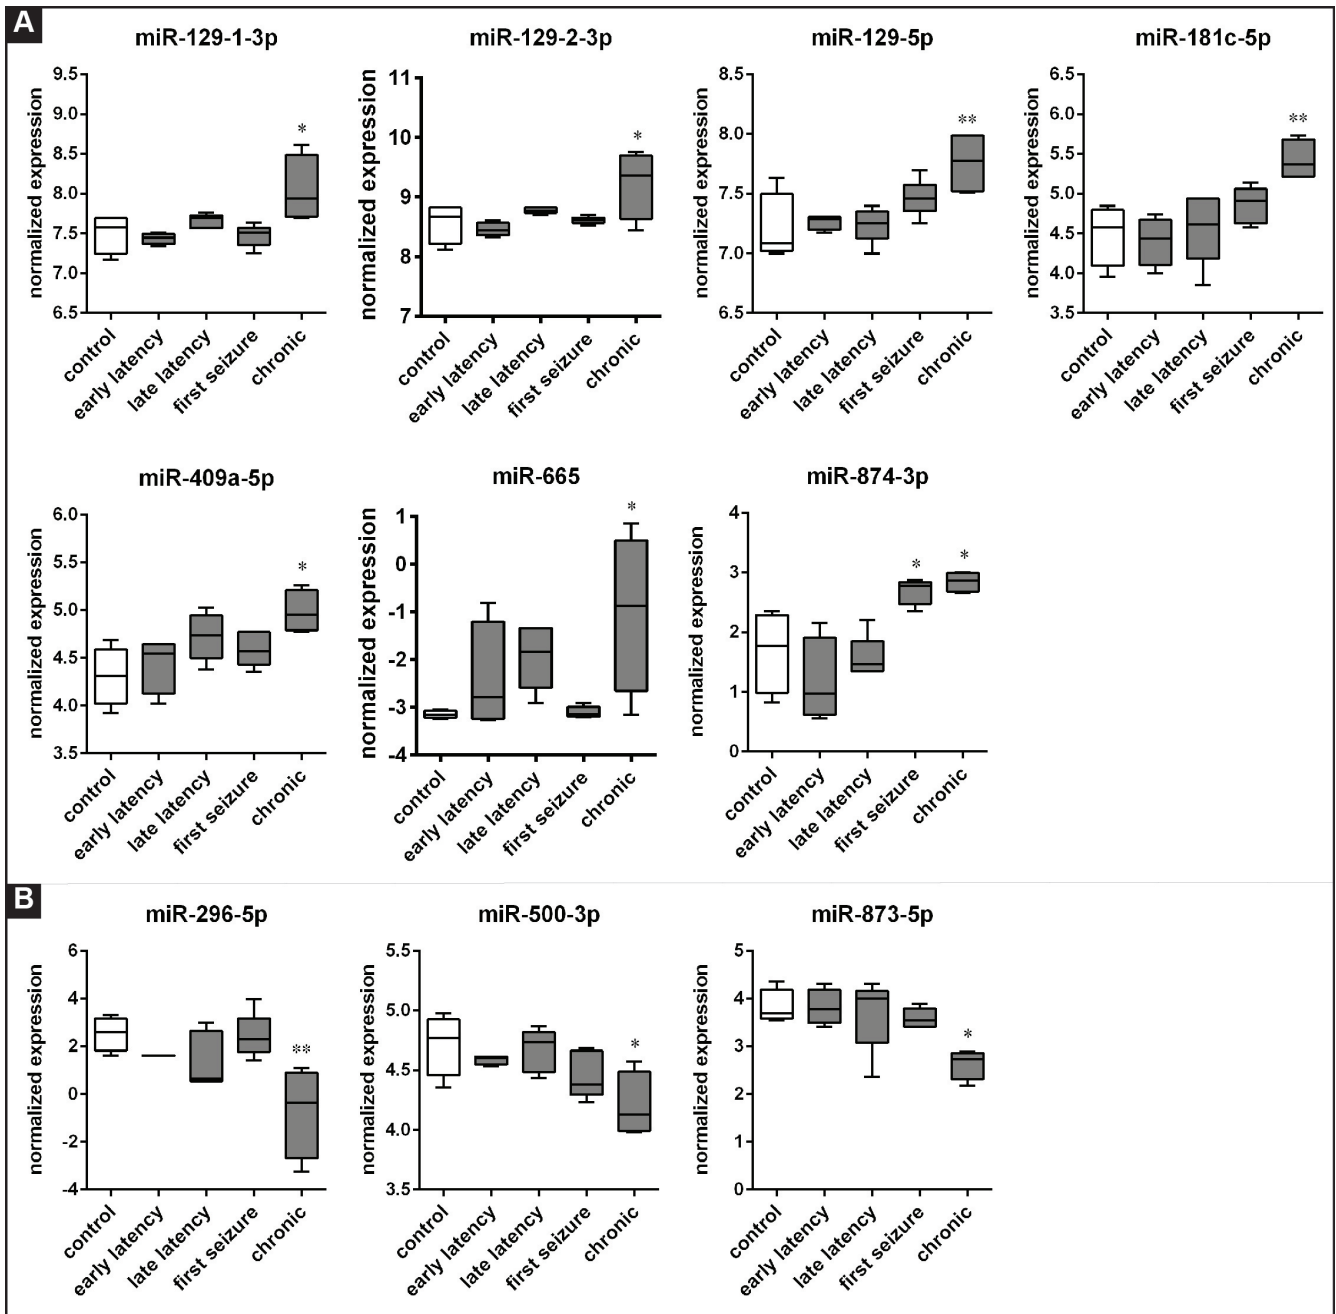

**Supplementary Fig. S3.** Deregulated miRNAs in the rat granule cell layer (GCL) during the chronic phase. The boxplots depict the time course of expression for 7 up-regulated (A) and 3 down-regulated (B) miRNAs identified as significant with a false discovery rate (FDR)<10% in the GCL by using one-way ANOVA. Each boxplot represents 4 animals. \*  $p < 0.05$ ; \*\*  $p < 0.01$ ; \*\*\*  $p < 0.001$ ; Tukey's test.

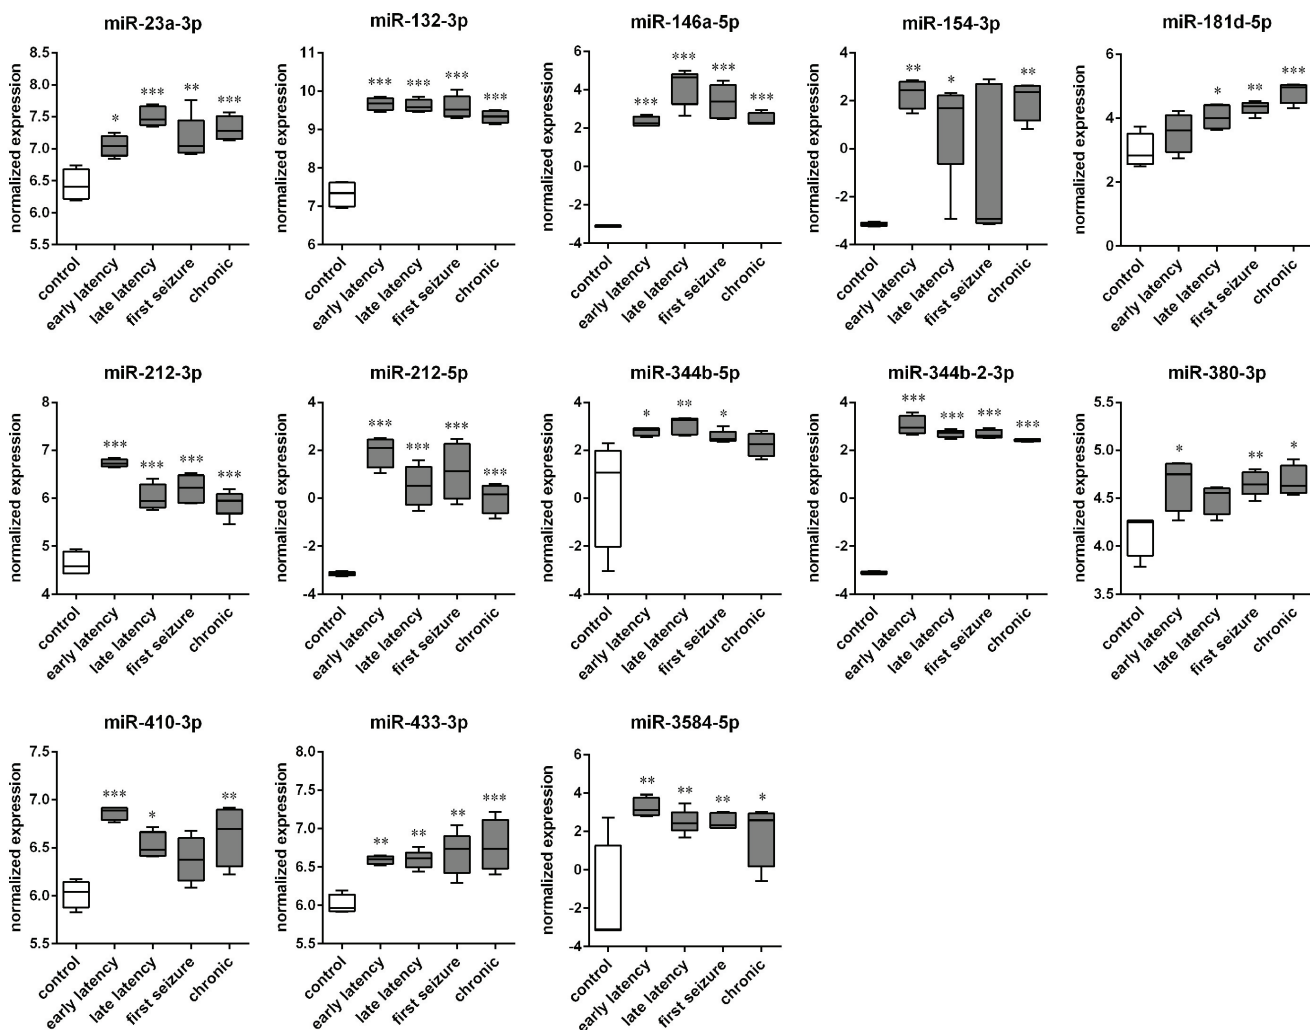

**Supplementary Fig. S4.** Up-regulated miRNAs in the rat granule cell layer (GCL) during latency. The boxplots depict the time course of expression for 13 of the miRNAs identified as significant with a false discovery rate (FDR) < 10% in the GCL by using one-way ANOVA. Each boxplot represents 4 animals. \* p < 0.05; \*\* p < 0.01; \*\*\* p < 0.001; Tukey's test.

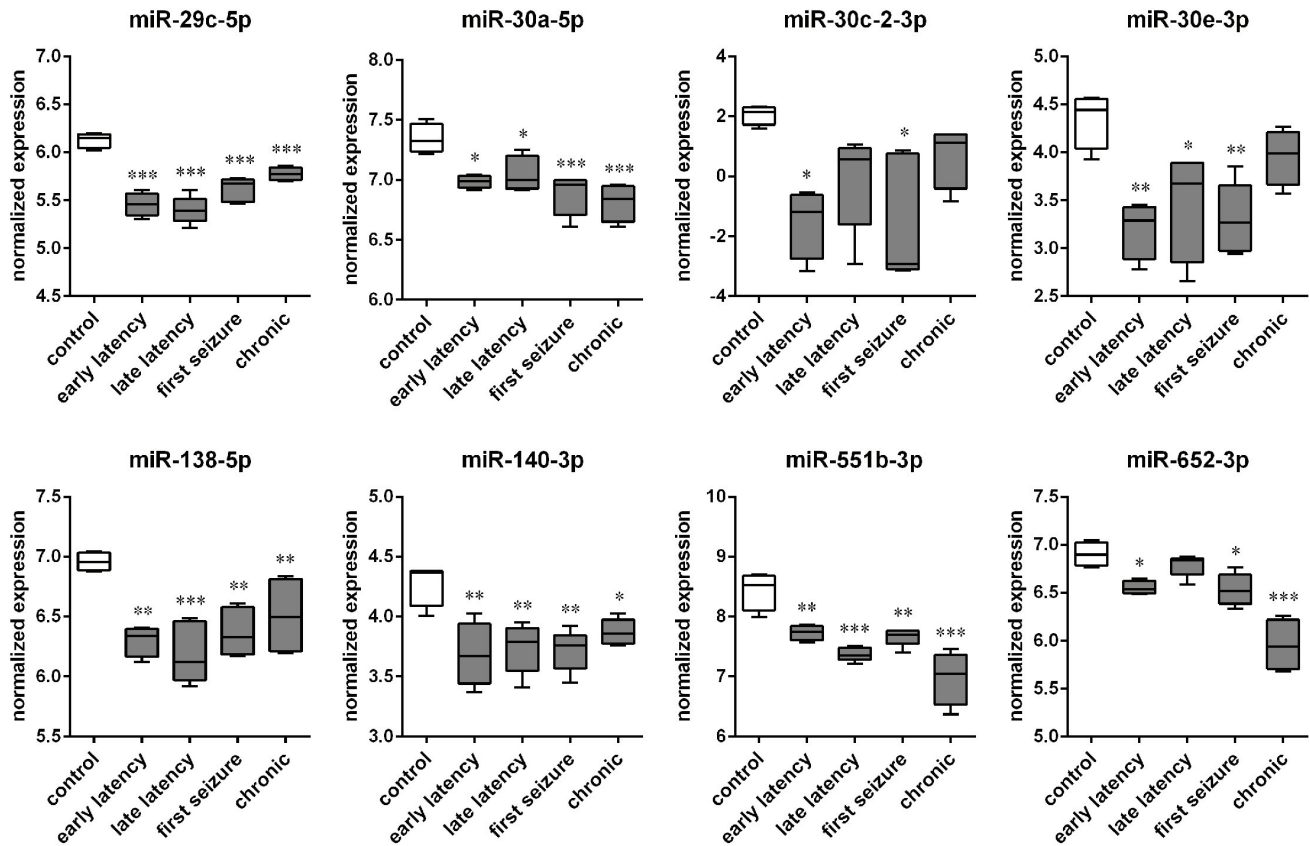

**Supplementary Fig. S5.** Down-regulated miRNAs in the rat granule cell layer (GCL) during latency. The boxplots depict the time course of expression for 8 of the miRNAs identified as significant with a false discovery rate (FDR)<10% in the GCL by using one-way ANOVA. Each boxplot represents 4 animals. \*  $p < 0.05$ ; \*\*  $p < 0.01$ ; \*\*\*  $p < 0.001$ ; Tukey's test.



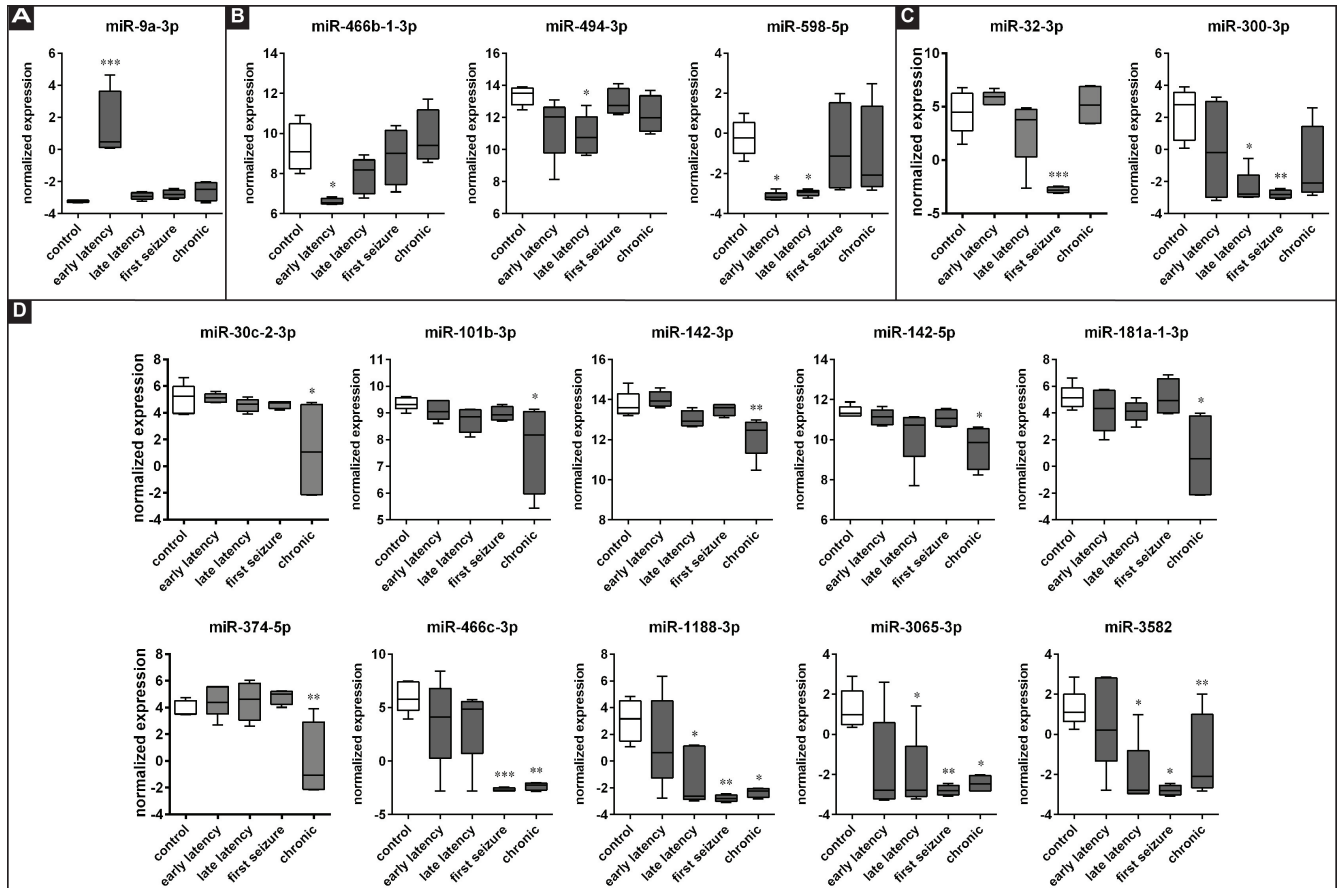

**Supplementary Fig. S7.** Deregulated miRNAs in the rat plasma during the all phases of the disease. The boxplots depict the time course for 16 of the miRNAs identified as significant by using one-way Anova. Each boxplot represents 5 animals. (A) miRNAs up-regulated during latency; (B) miRNAs down-regulated during latency; (C) miRNAs down-regulated in the first spontaneous seizure period; (D) miRNAs down regulated in the chronic period.
